# Supplementary material for: Solar Background Radiation Temperature Calibration of a Pure Rotational Raman Lidar
Source: Copernicus journal article supplement (doi:10.5194/egusphere-2024-1081), 2024-05-07
Supplement: Supplementary file [file egusphere-2024-1081-AC3-supplement.pdf]

1. In addition to the changes requested by the two reviewers, I would request a line or two be added somewhere to acknowledge that the stability of the RR temperatures can also depend on the laser stability. If the laser line drifts around by a few picometres due to temperature changes in the laser, then you could see a change in the retrieved RR temperatures up to a Kelvin. The optimal solution on the transmitter side is external seeding and a laser pulse spectrometer to measure the offset between the seed laser and the output of the power laser.

Thank you for your comment. Our laser is unseeded, with a linewidth of  $1 \text{ cm}^{-1}$  (30 GHz) as specified by Litron (communication on 25 April 2018). The temperature dependency of the laser line center is  $0.004 \text{ nm}/^\circ\text{C}$  at 1064 nm, which translates to approximately  $1.3 \text{ pm}/^\circ\text{C}$  at 355 nm (around  $3 \text{ GHz}/^\circ\text{C}$  or  $0.1 \text{ cm}^{-1}/^\circ\text{C}$ ). Considering variations of  $\pm 3^\circ\text{C}$  in the cooling system, this would result in a displacement of the laser frequency by  $\sim 0.3 \text{ cm}^{-1}$ . However, the PRR polychromator linewidth is estimated to be  $20\text{-}25 \text{ cm}^{-1}$  (600-750 GHz), based on the RALMO user manual (EPFL) and Martucci et al. (2021). This corresponds to the spectral width of the Stokes and Anti-Stokes spectra diffracted by the grating filter onto each optic fiber in the polychromator. Given that the laser is stabilized within a temperature range of  $\pm 2^\circ\text{C}$  by the water-cooling system, even a change of  $3^\circ\text{C}$  would only cause a relative displacement of 1/80th of the PRR polychromator spatial bandwidth. Thus, it would not affect the polychromator's ability to select the central main Stokes and Anti-Stokes lines (Tables 1-2, Martucci et al. 2021).
